1 **The costs of competition: high social status males experience accelerated epigenetic**  
2 **aging in wild baboons**

3  
4 Jordan A. Anderson<sup>1†</sup>, Rachel A. Johnston<sup>1†</sup>, Amanda J. Lea<sup>2,3,4</sup>, Fernando A. Campos<sup>2,5</sup>,  
5 Tawni N. Voyles<sup>1</sup>, Mercy Y. Akinyi<sup>6</sup>, Susan C. Alberts<sup>1,2,6</sup>, Elizabeth A. Archie<sup>6,7</sup>, Jenny  
6 Tung<sup>1,2,6,8,\*</sup>

7  
8 <sup>1</sup>Department of Evolutionary Anthropology, Duke University, Durham, North Carolina  
9 27708, USA

10 <sup>2</sup>Department of Biology, Duke University, Durham, North Carolina 27708, USA

11 <sup>3</sup>Lewis-Sigler Institute for Integrative Genomics, Carl Icahn Laboratory, Princeton  
12 University, Princeton, NJ 08544, USA

13 <sup>4</sup>Department of Ecology and Evolution, Princeton University, Princeton, NJ 08544, USA

14 <sup>5</sup>Department of Anthropology, University of Texas at San Antonio, San Antonio, TX 78249,  
15 USA

16 <sup>6</sup>Institute of Primate Research, National Museums of Kenya, Nairobi 00502, Kenya

17 <sup>7</sup>Department of Biological Sciences, University of Notre Dame, Notre Dame, Indiana 46556,  
18 USA

19 <sup>8</sup>Duke Population Research Institute, Duke University, Durham, NC 27708, USA

20

21 †Authors contributed equally to this work

22 \*Correspondence: jt5@duke.edu

23

24

25 **Summary**

26 Aging, for virtually all life, is inescapable. However, within species and populations,  
27 rates of biological aging (i.e., physical decline with age) vary across individuals.  
28 Understanding sources of variation in biological aging is therefore central to understanding  
29 the biodemography of natural populations. Here, we constructed a DNA methylation-based  
30 predictor of chronological age for a population of wild baboons in which behavioral,  
31 ecological, and life history data have been collected for almost 50 years (N = 277 blood  
32 samples from 245 individuals, including 30 who were longitudinally sampled). Consistent  
33 with findings in humans and model organisms [1-4], DNA methylation patterns exhibit a  
34 strong, clock-like association with chronological age, but individuals are often predicted to  
35 be somewhat older or younger than their known age. However, the two most robust  
36 predictors of lifespan described for this population—cumulative early adversity and social  
37 bond strength—do not explain this deviation. Instead, the single most predictive factor is  
38 male dominance rank: high-ranking males are predicted to be biologically older than their  
39 true chronological age, such that alpha males appear to be nearly a year older than their  
40 known age. Longitudinal sampling indicates that males who climb the social hierarchy  
41 subsequently look epigenetically “older,” likely reflecting the high energetic costs of rank  
42 attainment and maintenance in male baboons. Together, our results indicate that  
43 environmental effects on survival and epigenetic age can be disjunct, and that achieving  
44 high rank for male baboons—the best predictor of reproductive success—imposes  
45 physiological costs consistent with a “live fast, die young” life history strategy.

46  
47 **Keywords:** Epigenetic age, epigenetic clock, aging, DNA methylation, dominance rank,  
48 baboons

## 49 Results and discussion

50 We used a combination of previously published [5] and newly generated reduced-  
51 representation bisulfite sequencing (RRBS) data from 245 wild baboons (N = 277 blood  
52 samples) living in the Amboseli ecosystem of Kenya [6] to generate a DNA methylation-  
53 based age predictor (an “epigenetic clock:” [1, 2]). Starting with a data set of methylation  
54 levels for 458,504 CpG sites genome-wide (Figure S1; Table S1), we used elastic net  
55 regression to identify a set of 593 CpG sites that accurately predict baboon age to within a  
56 median absolute difference (MAD) of 1.1 years (Pearson’s  $r = 0.762$ ,  $p < 10^{-53}$ ; Table S2;  
57 median adult life expectancy in this population is 10.3 years for females and 7.94 for males  
58 [7]). Because the clock was significantly more accurate in males (N = 135; MAD = 0.9 years;  
59 Pearson’s  $r = 0.86$ ,  $p < 10^{-40}$ ) than in females (N = 142; MAD = 1.6 years;  $r = 0.78$ ,  $p < 10^{-29}$ ;  
60 two-sided Wilcoxon test for differences in absolute error by sex:  $p = 4.35 \times 10^{-9}$ ), we  
61 separated males and females for all subsequent analyses (Figure 1A and 1B).

62 Overall, the clock performed favorably relative to other morphological or biomarker  
63 predictors of age in this population. The epigenetic clock generally explained more  
64 variance in true chronological age, resulted in lower median error, and exhibited less bias  
65 than predictions based on body mass index (BMI) or blood cell composition data from flow  
66 cytometry or blood smears (traits found to change with age in baboons [8, 9]). Its  
67 performance was comparable to molar dentine exposure, a classical marker of age [10]  
68 (Figure S2). For 16 males and 14 females, we had two samples collected at different points  
69 in time. The predicted ages from these longitudinally collected samples were older for the  
70 later-collected samples, as expected (Figure 1C-D; binomial test  $p = 5.95 \times 10^{-5}$ ).  
71 Furthermore, the change in epigenetic clock predictions between successive longitudinal  
72 samples positively predicted the actual change in age between sample dates ( $\beta = 0.312$ ,  $p =$   
73  $0.027$ ).

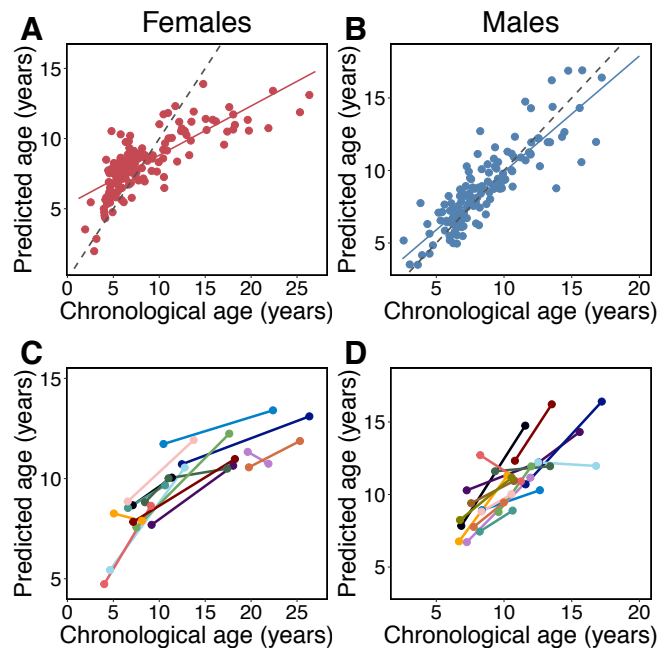

74 **Figure 1. Epigenetic clock age predictions in the Amboseli baboons.** Predicted ages are shown relative to  
75 true chronological ages for **(A)** females (Pearson’s  $r = 0.78$ ,  $p < 10^{-29}$ , N = 142 samples) and **(B)** males ( $r =$   
76  $0.86$ ,  $p < 10^{-40}$ , N = 135 samples). Solid lines represent the best fit line; dashed lines show the line for  $y = x$ . **(C)**

77 and **(D)** show predictions for individuals with at least two samples in the data set (14 females and 16 males,  
78 respectively). In 26 of 30 cases (87%), samples collected later were correctly predicted to be from an older  
79 animal.  
80

81 In addition to differences in overall accuracy, sex differences were also apparent in  
82 the slope of the relationship between predicted age and chronological age. Males show a  
83 2.2-fold higher rate of change in predicted age, as a function of chronological age, compared  
84 to females (Figure 1A-B; chronological age by sex interaction in a linear model for  
85 predicted age:  $\beta = 0.448$ ,  $p < 10^{-18}$ ,  $N = 277$ ). This result agrees with previous findings  
86 showing that male baboons senesce more rapidly than females—a pattern shared with  
87 most other primates investigated thus far, including humans [11]. Interestingly, sex  
88 differences are not apparent in animals  $< 8$  years, which roughly corresponds to the age at  
89 which the majority of males have achieved adult dominance rank and dispersed from their  
90 natal group [12-14] ( $N = 158$ , chronological age by sex interaction  $\beta = -0.038$ ,  $p = 0.808$ ).  
91 Rather, sex difference becomes apparent after baboons have reached full physiological and  
92 social adulthood ( $N = 119$ , chronological age by sex interaction  $\beta = 0.459$ ,  $p < 10^{-6}$  in  
93 animals  $\geq 8$  years), when divergence between male and female life history strategies is  
94 most marked [12-14] and when aging rates between the sexes are predicted to diverge [15-  
95 17]. This pattern suggests that within each sex, deviations between predicted age and  
96 chronological age—commonly interpreted as a measure of “biological age” or accelerated  
97 aging—may also be affected by environmental or life history variation, as has been  
98 suggested in humans, lab mice, and captive rhesus macaques [3, 4, 18, 19].

99 To test this hypothesis, we focused on four factors of known importance to fertility  
100 and/or survival components of fitness in the Amboseli baboon population. First, we  
101 investigated the effects of cumulative early adversity, which is a strong predictor of  
102 shortened lifespan in female baboons: females who experience three or more major  
103 sources of early adversity have expected adult lifespans that are a decade shorter than  
104 those who experience none [20]. Additionally, those females are less capable of raising  
105 their own juvenile offspring later in life, suggesting that early adversity compromises their  
106 physical condition over the long-term [21]. Following [20, 21], we measured cumulative  
107 adversity as a count of major adverse experiences suffered in early life, including low  
108 maternal social status, early life drought, a competing younger sibling, maternal loss, and  
109 high experienced population density. To maximize our sample size, we omitted early life  
110 social connectedness (included in [20] but omitted for the same reason in [21]), because  
111 social connectedness data were missing for mothers born relatively early in the long-term  
112 study. We predicted that high cumulative early adversity, which is linked to reduced  
113 lifespan, would predict increased biological age.

114 Second, we considered social bond strength in adulthood, which is positively  
115 associated with longer adult lifespan in female Amboseli baboons, human populations, and  
116 several other wild social mammals [22-24]. We predicted that low social bond strength,  
117 due to its relationship with decreased lifespan, would be associated with increased  
118 biological age.

119 Third, we investigated the effects of dominance rank, which is a major determinant  
120 of resource access in baboons. High-ranking males sire the most offspring, and high-  
121 ranking females experience shorter interbirth intervals, retain higher fertility during  
122 droughts, and form stronger social bonds with males [22, 25-27].

123 Finally, we assessed the effect of BMI, which captures dimensions of both body  
124 condition and competitive advantage [8]. In this case, we calculated BMI relative to the  
125 expected value for each male's age, which eliminates the correlation between BMI and age  
126 and BMI and rank. The predictions for dominance rank and body mass index associations  
127 were less clear: improved resource access could conceivably slow biological aging, but  
128 increased investment in growth and reproduction (either through higher fertility in  
129 females or physical competition for rank in males) could also be energetically costly.

130 We tested these predictions by modeling the deviation between predicted age and  
131 known chronological age ( $\Delta_{\text{age}}$ ) as a function of cumulative early adversity, ordinal  
132 dominance rank, body mass index (controlling for age), and for females, social bond  
133 strength to other females. Social bond strength was not included in the model for males, as  
134 this measure was unavailable for a large proportion of males in this data set (53.8%). We  
135 also included chronological age as a predictor in the model, as epigenetic age tends to be  
136 systematically overpredicted for young individuals and underpredicted for old individuals  
137 (Figure 1A-B); including chronological age in the model controls for this compression  
138 effect. No predictor variables were strongly linearly correlated (all  $R^2 < 0.10$ ; Table S3).

139 Surprisingly, despite being two of the strongest known predictors of lifespan in wild  
140 baboons, neither cumulative early life adversity nor social bond strength explain variation  
141 in  $\Delta_{\text{age}}$  (Table 1). In contrast, high male dominance rank is strongly and significantly  
142 associated with larger values of  $\Delta_{\text{age}}$  ( $\beta = -0.785$ ,  $p = 7.0 \times 10^{-4}$ ; Figure 2; Table 1). Alpha  
143 males are predicted to be an average of 10.95 months older than their true chronological  
144 age—a difference that translates to 11.5% of a male baboon's expected adult lifespan [7].

145 Dominance rank is strongly age structured in male baboons: males tend to attain their  
146 highest rank between 7 and 12 years of age and fall in rank thereafter. Thus, nearly all  
147 males in the top four rank positions in our data set were between 7 and 12 years of age at  
148 the time they were sampled (however, because not all 7 – 12 year-olds are high-ranking,  
149 low rank positions include males of all age groups; Table S1, Figure S3). Our finding that  
150 high rank predicts accelerated epigenetic aging therefore implies that males incur the costs  
151 of high rank primarily in early to mid-adulthood, and only if they succeed in attaining high  
152 rank. Accelerated epigenetic aging is thus a function of absolute rank values, regardless of  
153 age, not deviations from the mean rank expected given a male's age (i.e., “rank-for-age,”  
154 which can be quantified as the residuals of male dominance rank modeled as a quadratic  
155 function of chronological age: Figure S3). In support of this interpretation, a model that  
156 includes rank-for-age as an additional covariate recapitulates the significant effect of  
157 ordinal male rank ( $p=0.045$ ), but finds no effect of rank-for-age ( $p=0.819$ ; Table S4). In  
158 contrast, we observed no evidence for rank effects on  $\Delta_{\text{age}}$  in females, consistent with  
159 overall sex differences in patterns of aging in primates and other mammals [15] and  
160 marked sex differences in the effects of rank on other molecular phenotypes in the  
161 Amboseli baboons specifically [11, 28].

| Covariate                      | $\beta$       | P-value                                  | $\beta$       | P-value                                 |
|--------------------------------|---------------|------------------------------------------|---------------|-----------------------------------------|
|                                | (Female)      | (Female)                                 | (Male)        | (Male)                                  |
| Intercept                      | <b>5.400</b>  | <b><math>1.33 \times 10^{-15}</math></b> | <b>3.294</b>  | <b><math>1.19 \times 10^{-8}</math></b> |
| Cumulative early adversity     | -0.050        | 0.807                                    | -0.005        | 0.973                                   |
| Social bond strength           | 0.382         | 0.164                                    | —             | —                                       |
| Dominance rank                 | 0.025         | 0.228                                    | <b>-0.078</b> | <b><math>7.39 \times 10^{-4}</math></b> |
| Body mass index (age-adjusted) | 0.026         | 0.682                                    | <b>0.111</b>  | <b><math>6.33 \times 10^{-3}</math></b> |
| Chronological age              | <b>-0.699</b> | <b><math>1.62 \times 10^{-28}</math></b> | <b>-0.277</b> | <b><math>8.36 \times 10^{-8}</math></b> |

162 <sup>1</sup>Separate linear models for  $\Delta_{age}$  were fit for females (N = 66) and for males (N = 93) for whom no data values  
 163 were missing; social bond strength was not included in the model for males. Significant results are shown in  
 164 bold.

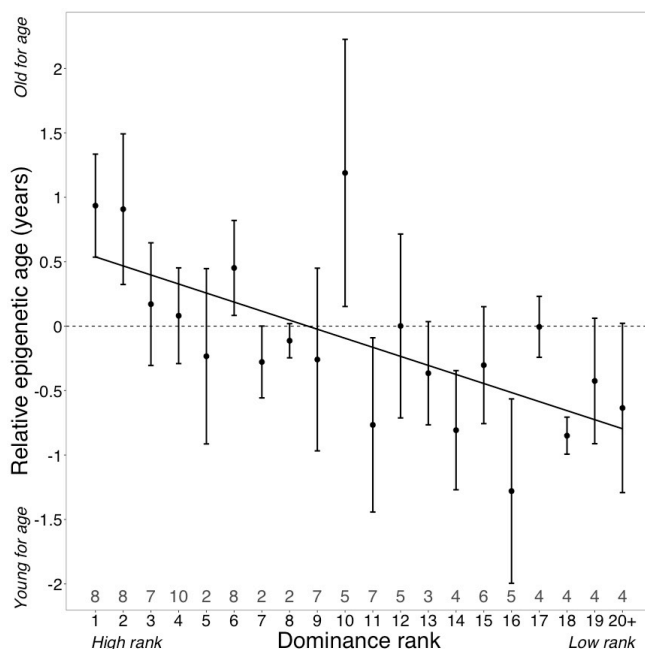

165 **Figure 2. Dominance rank predicts epigenetic aging in male baboons.** High rank is associated with  
 166 elevated values of  $\Delta_{age}$  ( $\beta = -0.0785$ ,  $p = 7.39 \times 10^{-4}$ ,  $N = 105$ ). The y-axis shows relative epigenetic age, a  
 167 measure of epigenetic aging similar to  $\Delta_{age}$  that is based on the sample-specific residuals from the  
 168 relationship between predicted age and true chronological age. Positive (negative) values correspond to  
 169 predicted ages that are older (younger) than expected for that chronological age. Dominance rank  
 170 is measured using ordinal values, such that smaller values indicate higher rank. Dots and error bars represent  
 171 the means and standard errors, respectively. Gray values above the x-axis indicate sample sizes for each rank.  
 172

173 Previous work has shown that high-ranking male baboons, but not high-ranking  
 174 female baboons, up-regulate gene expression in inflammation-related and immune  
 175 response pathways [28]. Elevated or chronic inflammation is thought to be one of the  
 176 hallmarks of aging, and, in human populations, is one of the strongest predictors of  
 177 mortality risk [29-31]. Consistent with these observations, CpG sites in the epigenetic clock  
 178 that increase in DNA methylation with age (N = 459 sites) are enriched in or near genes  
 179 that are up-regulated in the Amboseli baboons in response to the bacterial endotoxin  
 180 lipopolysaccharide (LPS), which is a strong driver of inflammation (Figure S3; Fisher's  
 181 exact test:  $\log_2(\text{odds ratio}) = 1.88$ ,  $p = 0.001$ ; gene expression data from [28]). In contrast,  
 182 clock sites that decrease in DNA methylation with age (N = 134) are significantly enriched  
 183 in or near genes that are down-regulated after LPS exposure (Fisher's exact test:  $\log_2(\text{OR}) =$

184 3.28,  $p = 0.002$ ). Clock sites, especially those for which DNA methylation is positively  
185 correlated with age, are also enriched in genes, CpG islands, promoter regions, and putative  
186 enhancers, compared to the background set of sites we initially considered as candidates  
187 for inclusion in the clock (Figure S4; Fisher's exact tests, all  $p < 0.005$ ; similar functional  
188 enrichment has been found in a human epigenetic clock [2]). Moreover, clock sites are  
189 enriched in regions previously found to change in methylation levels with age [32] and in  
190 regions showing regulatory activity in high-throughput reporter assays [33]. Together,  
191 these results suggest that accelerated epigenetic aging in males reflects functionally  
192 important changes in DNA methylation levels, concentrated in immune response and  
193 inflammation-related pathways.

194 In baboon males, dominance rank reflects physical condition and fighting ability.  
195 Rank is therefore dynamic across the life course, such that males in their prime (ages 7 –  
196 12) are most likely to be high-ranking, and the same male is likely to occupy multiple  
197 positions in the social hierarchy during his lifetime [14]. If accelerations in epigenetic age  
198 are tightly coupled to rank, our results predict that across longitudinally collected samples,  
199 a male who becomes higher ranking should look older for age in his second sample relative  
200 to first, whereas a male who loses status should look younger for age in his second sample  
201 relative to first. To assess this possibility, we calculated the residuals of the best fit line  
202 relating chronological age and predicted age (“relative epigenetic age”) for 14 males for  
203 whom we had repeated samples collected when they occupied different dominance rank  
204 positions ( $N = 28$  samples, 2 per male). In this data set, the sample collected when males  
205 were higher status typically predicted higher values of relative epigenetic age compared to  
206 the sample collected when they were lower status, consistent with high rank-associated  
207 accelerated biological aging (Figure 3; paired t-test,  $t = -2.31$ ,  $p = 0.038$ ). For example, in the  
208 case of one young adult male who we sampled at rank 18 and then rank 1, as he was first  
209 climbing the social hierarchy, the actual time that elapsed between samples was 0.79 years  
210 but he exhibited an increase in *predicted* age of 2.6 years. Moreover, the two males that  
211 showed a decrease in predicted age, despite increasing in chronological age (Figure 1D),  
212 were among those that experienced the greatest drop in social status between samples.  
213 Thus, change in rank between samples for the same male predicted change in  $\Delta_{\text{age}}$ ,  
214 controlling for chronological age ( $R^2 = 0.24$ ,  $p = 0.044$ ). Consistent with our cross-sectional  
215 results, we did not observe evidence for a relationship between change in  $\Delta_{\text{age}}$  and rank-  
216 for-age ( $R^2 = 0.14$ ,  $p = 0.135$ ).

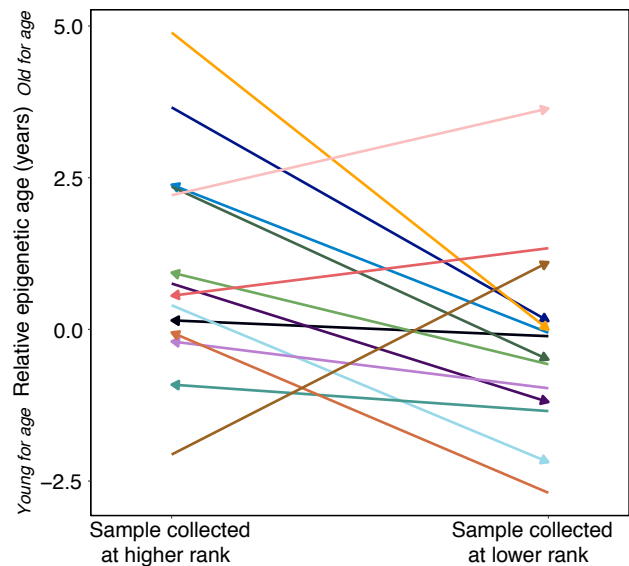

217 **Figure 3. Male baboons exhibit higher relative epigenetic age when they occupy higher ranks.** Relative  
218 epigenetic age for males in which multiple samples were collected when they occupied different ordinal rank  
219 values. Arrow indicates the temporal direction of rank changes: left-facing arrows represent cases in which  
220 the later sample was collected when males were higher-ranking, and right-facing arrows represent cases in  
221 the later sample was collected when males were lower-ranking.  
222

223 Together, our findings indicate that major environmental predictors of lifespan and  
224 mortality risk (e.g., social bond strength and early life adversity in this population) do not  
225 necessarily predict epigenetic measures of biological age. Although this assumption is  
226 widespread in the literature, including for epigenetic clock analyses [34, 35], our results  
227 are broadly consistent with empirical results in humans. Specifically, while studies of early  
228 life adversity, which also predicts lifespan in human populations, find relatively consistent  
229 support for a relationship between early adversity and accelerated epigenetic aging in  
230 children and adolescents [36-41], there is little evidence for the long-term effects of early  
231 adversity on epigenetic age in adulthood [42-47]. Thus, while DNA methylation may make  
232 an important contribution to the biological embedding of early adversity into adulthood  
233 [48, 49], it does not seem to do so through affecting the epigenetic clock itself. Social and  
234 environmental effects on the clock instead seem to be most influenced by concurrent  
235 conditions, lending support to “recency” models for environmental effects on aging that  
236 posit that health is more affected by the current environment than past experience [50-52].  
237 Additional longitudinal sampling will be necessary to evaluate whether current conditions  
238 alone can explain accelerated epigenetic aging, or whether it also requires integrating the  
239 effects of exposures across the life course (the “accumulation” model: [50, 52]). Repeated  
240 samples could also help exclude an alternative explanation for our findings: that viability  
241 selection against individuals who experienced high early adversity attenuates the true  
242 effect of cumulative early adversity on relative epigenetic age.

243 Finally, our analyses reveal that males who achieve high rank appear epigenetically  
244 older than expected given their known chronological age. Although high ranking males also  
245 tend to be larger due to increased muscle mass (Pearson’s  $r$  between rank and BMI = 0.56,  
246  $p = 6.38 \times 10^{-9}$ ), we observed an additional, independent effect of age-adjusted BMI: males  
247 who had high BMI relative to their age also looked older for age, controlling for rank and  
248 age ( $\beta = 0.1107$ ,  $p = 0.006$ ) (Table 1). These two effects suggest that investment in body



249 condition, which is a crucial factor in male competitive ability, incurs other physiological  
250 costs that compound to influence biological age. Indeed, previous research on the Amboseli  
251 baboons also points to costs of high rank, including high levels of glucocorticoids in alpha  
252 males [53], increased expression of genes involved in innate immunity and inflammation  
253 [28], and a trend towards elevated mortality risk [54]. These associations may arise  
254 because high-ranking males are both more likely to engage in physical conflict with other  
255 males, and more likely to spend long periods of time in energetically costly mate-guarding  
256 [55, 56]. Alternatively, males who are able to make significant investments in body  
257 condition, while tolerating their accompanying costs, may be able to successfully maintain  
258 high rank. Importantly, since doing so is likely to contribute to higher lifetime reproductive  
259 success for male baboons, the fitness-associated benefits of high rank can exceed the costs,  
260 even if accelerated biological aging increases the risk of mortality.

261

## 262 **Acknowledgements**

263 We gratefully acknowledge the support provided by the National Science Foundation and  
264 the National Institutes of Health for the majority of the data represented here, currently  
265 through NSF IOS 1456832, NIH R01AG053308, R01AG053330, R01HD088558, and  
266 P01AG031719. R.A.J. is supported by NIH F32HD095616 and J.A.A. by NSF #2018264636.  
267 We thank the members of the Amboseli Baboon Research Project for collecting the data  
268 presented here, especially J. Altmann for her foundational role in establishing the study  
269 population and these data sets; J. Gordon, N. Learn, and K. Pinc for managing the database;  
270 R.S. Mututua, S. Sayialel, and J.K. Warutere for data collection in the field; and T. Wango and  
271 V. Oudu for their assistance in Nairobi. We also thank the Kenya Wildlife Service, University  
272 of Nairobi, the Institute of Primate Research, the National Museums of Kenya, the National  
273 Council for Science, Technology, and Innovation, members of the Amboseli-Longido  
274 pastoralist communities, the Enduimet Wildlife Management Area, Ker & Downey Safaris,  
275 Air Kenya, and Safarilink for their assistance in Kenya. Finally, we thank current and past  
276 members of the Tung, Alberts, Archie, and Altmann labs for their helpful feedback. This  
277 research was approved by IACUCs at Duke University, University of Notre Dame, and  
278 Princeton University and adhered to all the laws and guidelines of Kenya. For a complete  
279 set of acknowledgments of funding sources, logistical assistance, and data collection and  
280 management, please visit <http://amboselibaboons.nd.edu/acknowledgements/>.

281

## 282 **Author Contributions**

283 Conceptualization, R.A.J., J.A.A., J.T., E.A.A., A.J.L.; Investigation, J.A.A., R.A.J., A.J.L., F.A.C.,  
284 M.Y.A., T.N.V., and J.T.; Formal Analysis, J.A.A. and R.A.J.; Writing—Original Draft, R.A.J.,  
285 J.A.A., and J.T.; Writing—Reviewing & Editing, R.A.J., J.A.A., A.J.L., T.N.V., M.Y.A., F.A.C., S.C.A.,  
286 E.A.A., and J.T. Funding Acquisition, J.T., S.C.A., and E.A.A. Supervision, J.T.

287

## 288 **Declaration of Interests**

289 The authors declare no competing interests.

290

291

## 292 **STAR Methods**

### 293 *Study population and biological sample collection*

294 This study focused on a longitudinally monitored population of wild baboons (*Papio*  
295 *cynocephalus*, the yellow baboon, with some admixture from the closely related anubis  
296 baboon *P. anubis* [57, 58]) in the Amboseli ecosystem of Kenya. This population has been  
297 continuously monitored by the Amboseli Baboon Research Project (ABRP) since 1971 [6].  
298 For the majority of study subjects (N = 242 of 245 individuals), birth dates were therefore  
299 known to within a few days' error; for the remainder, birth dates were known within 3  
300 months' error (Table S1).

301 All DNA methylation data were generated from blood-derived DNA obtained during  
302 periodic darting efforts, as detailed in [28, 59, 60]. Samples were obtained under approval  
303 from the Institutional Animal Care and Use Committee (IACUC) of Duke University and  
304 adhered to all the laws and guidelines of Kenya. In brief, individually recognized study  
305 subjects were temporarily anesthetized using a Telazol-loaded dart delivered through a  
306 blow gun. Baboons were then safely moved to a new location where blood samples and  
307 morphometric data, including body mass and crown-rump length, were collected. Baboons  
308 were then allowed to recover from anesthesia in a covered holding cage and released to  
309 their group within 2 – 4 hours. Blood samples were stored at -20 C in Kenya until export to  
310 the United States.

### 311 312 *DNA methylation data*

313 DNA methylation data were generated from blood-extracted DNA collected from  
314 known individuals in the Amboseli study population (N = 277 samples from 245 animals;  
315 14 females and 14 males were each sampled twice, and 1 female and 1 male were each  
316 sampled three times). Here, we analyzed a combined data set that included previously  
317 published reduced representation bisulfite sequencing [61] (RRBS) data from the same  
318 population (N = 36) [5] and new RRBS data from 241 additional individuals.

319 RRBS libraries were constructed following [62], using ~200 ng baboon DNA plus 0.2  
320 ng unmethylated lambda phage DNA per sample as input. Samples were sequenced to a  
321 mean depth of 17.8 ( $\pm$  10.5 s.d.) million reads on either the Illumina HiSeq 2000 or HiSeq  
322 4000 platform (Table S1), with an estimated mean bisulfite conversion efficiency (based on  
323 the conversion rate of lambda phage DNA) of 99.8% (minimum = 98.1%). Sequence reads  
324 were trimmed with Trim Galore! [63] to remove adapters and low quality sequence (Phred  
325 score < 20). Trimmed reads were mapped with BSMAP [64] to the baboon genome  
326 (*Pan2.0*) allowing a 10% mismatch rate to account for the degenerate composition of  
327 bisulfite-converted DNA. We used the mapped reads to count the number of methylated  
328 and total reads per CpG site, per sample [64, 65]. Following [5, 32], CpG sites were filtered  
329 to retain sites with a mean methylation level between 0.1 and 0.9 (i.e., to exclude  
330 constitutively hyper- or hypo-methylated sites) and mean coverage  $\geq$ 5x. We also excluded  
331 any CpG sites with missing data for  $\geq$ 15% of individuals in the sample. After filtering, we  
332 retained N = 458,504 CpG sites for downstream analysis. For the remaining missing data  
333 (mean number of missing sites per sample = 1.4%  $\pm$  3.5% s.d., equivalent to 6,409  $\pm$  16,024  
334 sites), we imputed methylation levels using a k-nearest neighbors approach in the R  
335 package *impute*, using default parameters [66].  
336

### 337 *Building the epigenetic clock*

338 We used the R package *glmnet* [67] to build a DNA methylation clock for baboons.  
339 Specifically, we fit a linear model in which the predictor variables were normalized levels of  
340 DNA methylation at 458,504 candidate clock CpG sites across the genome and the response  
341 variable was chronological age. To account for the excess of CpG sites relative to samples,  
342 *glmnet* uses an elastic net penalty to shrink predictor coefficients toward 0 [68]. Optimal  
343 alpha parameters were identified by grid searching across a range of alphas from 0  
344 (equivalent to ridge regression) to 1 (equivalent to LASSO) by increments of 0.1. We  
345 defined the optimal alpha as the value that maximized  $R^2$  between predicted and true  
346 chronological age across all samples. We set the regularization parameter lambda to the  
347 value that minimized mean-squared error during n-fold internal cross-validation.

348 To generate predicted age estimates for a given sample, we used a leave-one-out  
349 cross-validation approach in which all samples but the “test” sample were included for  
350 model training, and the resulting model was used to predict age for the left-out test sample.  
351 Importantly, training samples were scaled independently of the test sample in each leave-  
352 one-out model to avoid bleed-through of information from the test data into the training  
353 data. To do so, we first quantile normalized methylation ratios (the proportion of  
354 methylated counts to total counts for each CpG site) within each sample to a standard  
355 normal distribution. Training samples were then separated from the test sample and the  
356 methylation levels for each CpG site in the training set were quantile normalized across  
357 samples to a standard normal distribution. For predicting age in the test sample, we  
358 compared the methylation value for each site in the test sample to the empirical cumulative  
359 distribution function for the training samples (at the same site) to estimate the quantile in  
360 which the training sample methylation ratio fell. The training sample was then assigned the  
361 same quantile value from the standard normal distribution using the function *qnorm* in R.

362

### 363 *Comparisons to alternative predictors of aging*

364 To assess the utility of the DNA methylation clock relative to other data types, we  
365 compared its predictive accuracy to clocks based on three other age-related phenotypes:  
366 tooth wear (percent molar dentine exposure [10]), body condition (body mass index: BMI  
367 [8]), and blood cell type composition (blood smear counts and lymphocyte/monocyte  
368 proportions from flow cytometry performed on peripheral blood mononuclear cells, as in  
369 [28, 69]). Leave-one-out model training and prediction were performed for each data type  
370 using linear modeling (i.e., not *glmnet*, since the number of features was much less than the  
371 number of samples in this case). To compare the relative predictive accuracy of each data  
372 type, we calculated the  $R^2$  between predicted and chronological age, the median absolute  
373 difference between predicted and chronological age, and the bias in age predictions (the  
374 absolute value of 1- slope of the best fit line between predicted and chronological age)  
375 (Figure S2).

376 *Tooth wear.* Molar enamel in baboons wears away with age to expose the underlying  
377 dentine layer. Percent dentine exposure (PDE) on the molar occlusal surface has been  
378 shown to be strongly age-correlated in previous work [10]. To assess its predictive power,  
379 we obtained PDE data from tooth casts reported by Galbany and colleagues [10] for the left  
380 upper molars (tooth positions M1, M2, M3) and left lower molars (tooth positions M1, M2,  
381 M3) for 39 males and 34 females in our data set. For each molar position (M1, M2, M3)  
382 within each individual, we calculated PDE as the mean for the upper and lower molars.

383 Because dentine exposure scales quadratically with respect to age [10], we fit age as a  
384 function of PDE using the following model:  $age \sim \sqrt{PDE_{M1}} + \sqrt{PDE_{M2}} + \sqrt{PDE_{M3}}$ .

385 *Body mass index.* For both male and female baboons in Amboseli, body mass  
386 increases with age until individuals reach peak size, and then tends to decrease with age as  
387 animals lose fat and/or muscle mass [8]. To quantify body condition using body mass, we  
388 calculated body mass index (BMI) values for 139 males and 154 females for whom body  
389 mass and crown-rump length data were available from periodic darting efforts. We  
390 retained only measures taken from animals born into and sampled in wild-feeding study  
391 groups, when sex-skin swellings (in females only) that could affect crown-rump length  
392 measures were absent. BMI was calculated as mass (kilograms) divided by crown-rump  
393 length (meters squared), following [70]. To assess the predictive power of BMI for age, we  
394 built sex-specific piecewise-regression models. Breakpoints for the piecewise-regression  
395 models (to separate “youthful” versus “aged” animals) were set at 8 years old for males and  
396 10 years old for females, following findings from previous work on body mass in the  
397 Amboseli population [8].

398 *Blood cell type composition.* The proportions of different cell types in blood change  
399 across the life course, including in baboons [9]. We assessed the predictive power of blood  
400 cell composition for age using two data sets. First, we used data collected from blood smear  
401 counts (N = 134) for five major white blood cell types: basophils, eosinophils, monocytes,  
402 lymphocytes, and neutrophils. Second, we used data on the proportional representation of  
403 five peripheral blood mononuclear cell (PBMC) subsets: cytotoxic T cells, helper T cells, B  
404 cells, monocytes, and natural killer cells, measured using flow cytometry as reported by Lea  
405 and colleagues [28] (N = 53). Cell types were included as individual covariates for leave-  
406 one-out model training.

407

#### 408 *Sources of variance in predicted age*

409 We asked whether factors known to be associated with inter-individual variation in  
410 fertility or survival also predict inter-individual variation in  $\Delta_{age}$  (predicted age from the  
411 epigenetic clock minus known chronological age). To do so, we fit linear models separately  
412 for males and females, with  $\Delta_{age}$  as the dependent variable and dominance rank at the time  
413 of sampling, cumulative early adversity, relative BMI (corrected for age), and chronological  
414 age as predictor variables [20]). For females, we also included a measure of social bond  
415 strength to other females as a predictor variable, based on findings that show that socially  
416 isolated females experience higher mortality rates in adulthood [22, 71]. Samples with  
417 missing values for any of the predictor variables were excluded in the model, resulting in a  
418 final analysis set of 66 female samples (from 59 females) and 93 male samples (from 84  
419 males). The chronological ages of samples with complete data relative to samples with  
420 missing data were equivalent for females (t-test,  $t = 1.95$ ,  $p = 0.053$ ) but were slightly lower  
421 for males (t-test,  $t = -3.04$ ,  $p = 0.003$ ; mean chronological ages are 7.98 and 9.65 years for  
422 complete and missing samples, respectively). Predictor variables were measured as  
423 follows.

424 *Dominance rank.* Sex-specific dominance hierarchies were constructed monthly for  
425 every social group in the study population based on the outcomes of dyadic aggressive  
426 encounters. Ordinal dominance ranks were assigned to every adult based on these  
427 hierarchies, such that low numbers represent high rank/social status and high numbers

428 represent low rank/social status [72]. Although most analyses of data from the Amboseli  
429 baboons have used ordinal ranks as the primary measure of social status, in some analyses  
430 proportional rank (i.e., the proportion of same-sex members of an individual's social group  
431 that he or she dominates) has proven to be a stronger predictor of behavioral, life history,  
432 or physiological outcomes [73]. In this study, we chose to use ordinal ranks, but  
433 proportional and ordinal dominance rank were highly correlated in our dataset ( $r^2=.70$ ,  
434  $p=1.13 \times 10^{-58}$ ). Using proportional rank rather than ordinal rank did not qualitatively  
435 affect our analyses. Additionally, to investigate whether the patterns we observed are due  
436 to a consistent effect of rank across all ages, or instead an effect of being high or low rank  
437 relative to the expected (mean) value for a male's age, we also calculated a "rank-for-age"  
438 value. Rank-for-age is defined as the residuals of a model with dominance rank as the  
439 response variable and age and age<sup>2</sup> as the predictor variables (Fig S4).

440 *Cumulative early adversity.* Previous work in Amboseli defined a cumulative early  
441 adversity score as the sum of 6 different adverse conditions that a baboon could experience  
442 during early life [20]. This index strongly predicts adult lifespan in female baboons, and a  
443 modified version of this index also predicts offspring survival [21]. To maximize the sample  
444 size available for analysis, we excluded maternal social connectedness, the source of  
445 adversity with the highest frequency of missing data, leaving us with a cumulative early  
446 adversity score generated from 5 different binary-coded adverse experiences. These  
447 experiences were: (i) early life drought (defined as  $\leq 200$  mm of rainfall in the first year of  
448 life), which is linked to reduced fertility in females [27, 74]; (ii) having a low ranking  
449 mother (defined as falling within the lowest quartile of ranks for individuals in the dataset),  
450 which predicts rates of maturation [75-77]; (iii) having a close-in-age younger sibling ( $<1.5$   
451 years), which may redirect maternal investment to the sibling [78], (iv) being born into a  
452 large social group, which may increase within-group competition for shared resources [27,  
453 77, 79], and (v) maternal death before the age of 4, which results in a loss of both social and  
454 nutritional resources [77, 80].

455 *Body mass index.* BMI was modeled as the residuals from sex-specific piecewise  
456 regression models relating BMI to age. By taking this approach, we asked whether having  
457 relatively high BMI for one's age and sex predicted higher (or lower)  $\Delta_{\text{age}}$ .

458 *Social bond strength.* For this analysis, we measured female social bond strength to  
459 other females using the dyadic sociality index (F-DSI) [54]. We did not include this  
460 parameter (male's social bond strength to females) for the male model, because this  
461 measure is unavailable for young males in this dataset. F-DSI was calculated as an  
462 individual's average bond strength with her top three female social partners, in the 365  
463 days prior to the day of sampling, controlling for observer effort. This approach is based on  
464 representative interaction sampling of grooming interactions between females, in which  
465 observers record all grooming interactions in their line of sight while moving through the  
466 group conducting random-ordered, 10-minute long focal animal samples of pre-selected  
467 individuals. Because smaller groups receive more observer effort per individual and per  
468 dyad (and thus record more grooming interactions per individual or dyad), we estimated  
469 observer effort for dyad  $d$  in year  $y$  as:

$$470 \quad E_{d,y} = \frac{c_d(s_d)}{f_d}$$

471 where  $c_d$  is the number of days the two females in a dyad were coresident in the same

472 social group,  $s_d$  is the number of focal samples taken during the dyad's coresidence, and  $f_d$   
473 is the average number of females in the group during the dyad's coresidence.

474 F-DSI for each adult female dyad in each year is the z-scored residual,  $\varepsilon$ , from the  
475 model:

$$476 \log(R_{d,y}) = \beta(\log(E_{d,y})) + \varepsilon$$

477 where  $R_{d,y}$  is the number of grooming interactions for dyad  $d$  in year  $y$  divided by the  
478 number of days that the two individuals were coresident, and  $E_{d,y}$  is observer effort.

479

#### 480 *Analysis of longitudinal samples*

481 To test whether changes in rank predict changes in relative epigenetic age within  
482 individuals, we used data from 5 males from the original dataset and generated additional  
483 RRBS data for 9 samples, resulting in a final set of 14 males who each were sampled at least  
484 twice in the data set, when they occupied different ordinal ranks (mean years elapsed  
485 between samples =  $3.92 \pm 1.94$  s.d.; mean absolute difference in dominance ranks =  $6.86 \pm$   
486  $5.07$  s.d.). This effort increased our total sample size to  $N = 286$  samples from 248 unique  
487 individuals. To incorporate the new samples into our analysis, we reperformed leave-one-  
488 out age prediction with  $N$ -fold internal cross validation at the optimal alpha selected for the  
489 original  $N = 277$  samples (alpha = 0.1). For the 277 samples carried over from the original  
490 analysis, we verified that age predictions were nearly identical between the previous  
491 analysis and the expanded data set ( $R^2 = 0.98$ ,  $p = 2.21 \times 10^{-239}$ ).

492 Based on the new age predictions for males in the data set ( $N = 144$ ), we again  
493 calculated relative epigenetic age as the residual of the best fit line relating predicted age to  
494 chronological age. We then used the 14 males with repeated DNA methylation profiles and  
495 rank measures in this dataset to test whether, within individuals, changes in dominance  
496 rank or rank-for-age explained changes in relative epigenetic age between samples.

497

#### 498 *Epigenetic clock enrichment analyses*

499 To evaluate whether CpG sites included in the epigenetic clock were enriched in  
500 functionally important regions of the baboon genome [32, 81], we used two-sided Fisher's  
501 exact tests to investigate enrichment/depletion of the 593 epigenetic clock sites in (i) gene  
502 bodies and exons, based on the Ensembl annotation *Panu2.0.90*; (ii) CpG islands annotated  
503 in the UCSC Genome Browser; (iii) CpG shores, defined as the 2,000 basepairs flanking CpG  
504 islands (following [32, 81, 82]); and (iv) promoter regions, defined as the 2,000 basepairs  
505 upstream of the 5'-most annotated transcription start site for each protein-coding gene  
506 (following [32, 81]). We also considered (v) putative enhancer regions, which have not  
507 been annotated for the *Panu2.0* assembly. We therefore used ENCODE H3K4me1 ChIP-seq  
508 data from humans [83] and the *liftOver* tool to define likely enhancer coordinates in  
509 *Panu2.0*.

510 We also tested for enrichment of clock sites in regions of the genome that have been  
511 identified by previous empirical studies to be of special interest. First, we considered  
512 regions that likely have regulatory activity in blood cells, defined as all 200 base-pair  
513 windows that showed evidence of enhancer activity in a recently performed massively  
514 parallel reporter assay [33]. We used *liftOver* to identify the inferred homologous *Panu2.0*  
515 coordinates for these windows, which were originally defined in the human genome.  
516 Second, we defined age-related differentially methylated regions (age DMRs) in the

517 Amboseli baboons based on genomic intervals found, in previous analyses, to contain at  
518 least three closely spaced age-associated CpG sites (inter-CpG distance  $\leq$  1kb), as described  
519 in [32]. Third, we defined lipopolysaccharide (LPS) up-regulated and LPS down-regulated  
520 genes as those genes that were significantly differentially expressed (1% false discovery  
521 rate) between unstimulated Amboseli baboon white blood cells and LPS-stimulated cells  
522 from the same individual, following 10 hours of culture in parallel [28].

523

524 Data and code availability

525 All sequencing data generated during this study are available in the NCBI Sequence Read  
526 Archive (project accession PRJNA607996).

527 References

- 528 1. Hannum, G., Guinney, J., Zhao, L., Zhang, L., Hughes, G., Sada, S., Klotzle, B., Bibikova,  
529 M., Fan, J.-B., and Gao, Y. (2013). Genome-wide methylation profiles reveal  
530 quantitative views of human aging rates. *Molecular cell* *49*, 359-367.
- 531 2. Horvath, S. (2013). DNA methylation age of human tissues and cell types. *Genome*  
532 *biology* *14*, 3156.
- 533 3. Petkovich, D.A., Podolskiy, D.I., Lobanov, A.V., Lee, S.-G., Miller, R.A., and Gladyshev,  
534 V.N. (2017). Using DNA methylation profiling to evaluate biological age and  
535 longevity interventions. *Cell metabolism* *25*, 954-960. e956.
- 536 4. Stubbs, T.M., Bonder, M.J., Stark, A.-K., Krueger, F., von Meyenn, F., Stegle, O., and  
537 Reik, W. (2017). Multi-tissue DNA methylation age predictor in mouse. *Genome*  
538 *biology* *18*, 68.
- 539 5. Lea, A.J., Altmann, J., Alberts, S.C., and Tung, J. (2016). Resource base influences  
540 genome - wide DNA methylation levels in wild baboons (*Papio cynocephalus*).  
541 *Molecular ecology* *25*, 1681-1696.
- 542 6. Alberts, S.C., and Altmann, J. (2012). The Amboseli Baboon Research Project: 40  
543 years of continuity and change. In *Long-term field studies of primates*. (Springer),  
544 pp. 261-287.
- 545 7. Colchero, F., Rau, R., Jones, O.R., Barthold, J.A., Conde, D.A., Lenart, A., Nemeth, L.,  
546 Scheuerlein, A., Schoeley, J., and Torres, C. (2016). The emergence of longevous  
547 populations. *Proceedings of the National Academy of Sciences* *113*, E7681-E7690.
- 548 8. Altmann, J., Gesquiere, L., Galbany, J., Onyango, P.O., and Alberts, S.C. (2010). Life  
549 history context of reproductive aging in a wild primate model. *Annals of the New*  
550 *York Academy of Sciences* *1204*, 127-138.
- 551 9. Jayashankar, L., Brasky, K.M., Ward, J.A., and Attanasio, R. (2003). Lymphocyte  
552 modulation in a baboon model of immunosenescence. *Clin. Diagn. Lab. Immunol.* *10*,  
553 870-875.
- 554 10. Galbany, J., Altmann, J., Pérez - Pérez, A., and Alberts, S.C. (2011). Age and individual  
555 foraging behavior predict tooth wear in Amboseli baboons. *American Journal of*  
556 *Physical Anthropology* *144*, 51-59.
- 557 11. Bronikowski, A.M., Altmann, J., Brockman, D.K., Cords, M., Fedigan, L.M., Pusey, A.,  
558 Stoinski, T., Morris, W.F., Strier, K.B., and Alberts, S.C. (2011). Aging in the natural  
559 world: comparative data reveal similar mortality patterns across primates. *Science*  
560 *331*, 1325-1328.
- 561 12. Alberts, S.C., and Altmann, J. (1995). Balancing costs and opportunities: dispersal in  
562 male baboons. *The American Naturalist* *145*, 279-306.
- 563 13. Alberts, S.C., and Altmann, J. (1995). Preparation and activation: determinants of age  
564 at reproductive maturity in male baboons. *Behavioral Ecology and Sociobiology* *36*,  
565 397-406.
- 566 14. Alberts, S.C., Watts, H.E., and Altmann, J. (2003). Queuing and queue-jumping: long-  
567 term patterns of reproductive skew in male savannah baboons, *Papio cynocephalus*.  
568 *Animal Behaviour* *65*, 821-840.
- 569 15. Clutton-Brock, T.H., and Isvaran, K. (2007). Sex differences in ageing in natural  
570 populations of vertebrates. *Proceedings of the Royal Society B: Biological Sciences*  
571 *274*, 3097-3104.



- 572 16. Kirkwood, T.B., and Rose, M.R. (1991). Evolution of senescence: late survival  
573 sacrificed for reproduction. *Philosophical Transactions of the Royal Society of*  
574 *London. Series B: Biological Sciences* 332, 15-24.
- 575 17. Williams, G.C. (1957). Pleiotropy, natural selection, and the evolution of senescence.  
576 *evolution*, 398-411.
- 577 18. Maegawa, S., Lu, Y., Tahara, T., Lee, J.T., Madzo, J., Liang, S., Jelinek, J., Colman, R.J.,  
578 and Issa, J.-P.J. (2017). Caloric restriction delays age-related methylation drift.  
579 *Nature communications* 8, 539.
- 580 19. Ryan, J., Wrigglesworth, J., Loong, J., Fransquet, P.D., and Woods, R.L. (2019). A  
581 systematic review and meta-analysis of environmental, lifestyle and health factors  
582 associated with DNA methylation age. *The journals of gerontology. Series A,*  
583 *Biological sciences and medical sciences.*
- 584 20. Tung, J., Archie, E.A., Altmann, J., and Alberts, S.C. (2016). Cumulative early life  
585 adversity predicts longevity in wild baboons. *Nature communications* 7, 11181.
- 586 21. Zippel, M.N., Archie, E.A., Tung, J., Altmann, J., and Alberts, S.C. (2019).  
587 Intergenerational effects of early adversity on survival in wild baboons. *eLife* 8,  
588 e47433.
- 589 22. Archie, E.A., Tung, J., Clark, M., Altmann, J., and Alberts, S.C. (2014). Social affiliation  
590 matters: both same-sex and opposite-sex relationships predict survival in wild  
591 female baboons. *Proceedings of the Royal Society B: Biological Sciences* 281,  
592 20141261.
- 593 23. Holt-Lunstad, J., Smith, T.B., and Layton, J.B. (2010). Social relationships and  
594 mortality risk: a meta-analytic review. *PLoS Med* 7, e1000316.
- 595 24. Snyder-Mackler, N., Burger, J.R., Gaydos, L., Belsky, D., Noppert, G.A., Campos, F.A.,  
596 Bartolomucci, A., Yang, Y.C., Aiello, A.E., O'Rand, A., et al. Social determinants of  
597 health and survival in humans and other animals. In review.
- 598 25. Alberts, S.C., Buchan, J.C., and Altmann, J. (2006). Sexual selection in wild baboons:  
599 from mating opportunities to paternity success. *Animal Behaviour* 72, 1177-1196.
- 600 26. Gesquiere, L.R., Altmann, J., Archie, E.A., and Alberts, S.C. (2018). Interbirth intervals  
601 in wild baboons: Environmental predictors and hormonal correlates. *American*  
602 *journal of physical anthropology* 166, 107-126.
- 603 27. Lea, A.J., Altmann, J., Alberts, S.C., and Tung, J. (2015). Developmental constraints in  
604 a wild primate. *The American Naturalist* 185, 809-821.
- 605 28. Lea, A.J., Akinyi, M.Y., Nyakundi, R., Mareri, P., Nyundo, F., Kariuki, T., Alberts, S.C.,  
606 Archie, E.A., and Tung, J. (2018). Dominance rank-associated gene expression is  
607 widespread, sex-specific, and a precursor to high social status in wild male baboons.  
608 *Proceedings of the National Academy of Sciences* 115, E12163-E12171.
- 609 29. Castagné, R., Garès, V., Karimi, M., Chadeau-Hyam, M., Vineis, P., Delpierre, C., Kelly-  
610 Irving, M., and Consortium, L. (2018). Allostatic load and subsequent all-cause  
611 mortality: which biological markers drive the relationship? Findings from a UK birth  
612 cohort. *European journal of epidemiology* 33, 441-458.
- 613 30. Levine, M.E. (2012). Modeling the rate of senescence: can estimated biological age  
614 predict mortality more accurately than chronological age? *Journals of Gerontology*  
615 *Series A: Biomedical Sciences and Medical Sciences* 68, 667-674.
- 616 31. López-Otín, C., Blasco, M.A., Partridge, L., Serrano, M., and Kroemer, G. (2013). The  
617 hallmarks of aging. *Cell* 153, 1194-1217.

- 618 32. Lea, A.J., Tung, J., and Zhou, X. (2015). A flexible, efficient binomial mixed model for  
619 identifying differential DNA methylation in bisulfite sequencing data. *PLoS genetics*  
620 *11*, e1005650.
- 621 33. Lea, A.J., Vockley, C.M., Johnston, R.A., Del Carpio, C.A., Barreiro, L.B., Reddy, T.E., and  
622 Tung, J. (2018). Genome-wide quantification of the effects of DNA methylation on  
623 human gene regulation. *eLife* *7*, e37513.
- 624 34. Liu, Z., Chen, B.H., Assimes, T.L., Ferrucci, L., Horvath, S., and Levine, M.E. (2019). The  
625 role of epigenetic aging in education and racial/ethnic mortality disparities among  
626 older US Women. *Psychoneuroendocrinology* *104*, 18-24.
- 627 35. Shalev, I., and Belsky, J. (2016). Early-life stress and reproductive cost: A two-hit  
628 developmental model of accelerated aging? *Medical Hypotheses* *90*, 41-47.
- 629 36. Brody, G.H., Miller, G.E., Yu, T., Beach, S.R., and Chen, E. (2016). Supportive family  
630 environments ameliorate the link between racial discrimination and epigenetic  
631 aging: A replication across two longitudinal cohorts. *Psychological Science* *27*, 530-  
632 541.
- 633 37. Brody, G.H., Yu, T., Chen, E., Beach, S.R., and Miller, G.E. (2016). Family - centered  
634 prevention ameliorates the longitudinal association between risky family processes  
635 and epigenetic aging. *Journal of child psychology and psychiatry* *57*, 566-574.
- 636 38. Davis, E., Humphreys, K., McEwen, L., Sacchet, M., Camacho, M., MacIsaac, J., Lin, D.,  
637 Kobor, M., and Gotlib, I. (2017). Accelerated DNA methylation age in adolescent  
638 girls: associations with elevated diurnal cortisol and reduced hippocampal volume.  
639 *Translational psychiatry* *7*, e1223.
- 640 39. Jovanovic, T., Vance, L.A., Cross, D., Knight, A.K., Kilaru, V., Michopoulos, V., Klengel,  
641 T., and Smith, A.K. (2017). Exposure to violence accelerates epigenetic aging in  
642 children. *Scientific reports* *7*, 8962.
- 643 40. Marini, S., Davis, K.A., Soare, T.W., Suderman, M.J., Simpkin, A.J., Smith, A.D., Wolf, E.J.,  
644 Relton, C.L., and Dunn, E.C. (2018). Predicting cellular aging following exposure to  
645 adversity: Does accumulation, recency, or developmental timing of exposure  
646 matter? *BioRxiv*, 355743.
- 647 41. Sumner, J.A., Colich, N.L., Uddin, M., Armstrong, D., and McLaughlin, K.A. (2019).  
648 Early experiences of threat, but not deprivation, are associated with accelerated  
649 biological aging in children and adolescents. *Biological psychiatry* *85*, 268-278.
- 650 42. Austin, M.K., Chen, E., Ross, K.M., McEwen, L.M., MacIsaac, J.L., Kobor, M.S., and  
651 Miller, G.E. (2018). Early-life socioeconomic disadvantage, not current, predicts  
652 accelerated epigenetic aging of monocytes. *Psychoneuroendocrinology* *97*, 131-134.
- 653 43. Boks, M.P., van Mierlo, H.C., Rutten, B.P., Radstake, T.R., De Witte, L., Geuze, E.,  
654 Horvath, S., Schalkwyk, L.C., Vinkers, C.H., and Broen, J.C. (2015). Longitudinal  
655 changes of telomere length and epigenetic age related to traumatic stress and post-  
656 traumatic stress disorder. *Psychoneuroendocrinology* *51*, 506-512.
- 657 44. Lawn, R.B., Anderson, E.L., Suderman, M., Simpkin, A.J., Gaunt, T.R., Teschendorff,  
658 A.E., Widschwendter, M., Hardy, R., Kuh, D., and Relton, C.L. (2018). Psychosocial  
659 adversity and socioeconomic position during childhood and epigenetic age: analysis  
660 of two prospective cohort studies. *Human molecular genetics* *27*, 1301-1308.
- 661 45. Simons, R.L., Lei, M.K., Beach, S.R., Philibert, R.A., Cutrona, C.E., Gibbons, F.X., and  
662 Barr, A. (2016). Economic hardship and biological weathering: the epigenetics of

- 663 aging in a US sample of black women. *Social Science & Medicine* *150*, 192-200.
- 664 46. Wolf, E.J., Maniates, H., Nugent, N., Maihofer, A.X., Armstrong, D., Ratanatharathorn,  
665 A., Ashley-Koch, A.E., Garrett, M., Kimbrel, N.A., and Lori, A. (2018). Traumatic stress  
666 and accelerated DNA methylation age: a meta-analysis. *Psychoneuroendocrinology*  
667 *92*, 123-134.
- 668 47. Zannas, A.S., Arloth, J., Carrillo-Roa, T., Iurato, S., Röh, S., Ressler, K.J., Nemeroff, C.B.,  
669 Smith, A.K., Bradley, B., and Heim, C. (2015). Lifetime stress accelerates epigenetic  
670 aging in an urban, African American cohort: relevance of glucocorticoid signaling.  
671 *Genome biology* *16*, 266.
- 672 48. Aristizabal, M.J., Anreiter, I., Halldorsdottir, T., Odgers, C.L., McDade, T.W.,  
673 Goldenberg, A., Mostafavi, S., Kobor, M.S., Binder, E.B., and Sokolowski, M.B. (2019).  
674 Biological embedding of experience: A primer on epigenetics. *Proceedings of the*  
675 *National Academy of Sciences*, 201820838.
- 676 49. Hertzman, C. (2012). Putting the concept of biological embedding in historical  
677 perspective. *Proceedings of the National Academy of Sciences* *109*, 17160-17167.
- 678 50. Ben-Shlomo, Y., and Kuh, D. (2002). A life course approach to chronic disease  
679 epidemiology: conceptual models, empirical challenges and interdisciplinary  
680 perspectives. (Oxford University Press).
- 681 51. Shanahan, L., Copeland, W.E., Costello, E.J., and Angold, A. (2011). Child-, adolescent-  
682 and young adult-onset depressions: differential risk factors in development?  
683 *Psychological medicine* *41*, 2265-2274.
- 684 52. Shanahan, M.J., and Hofer, S.M. (2011). Molecular genetics, aging, and well-being:  
685 Sensitive period, accumulation, and pathway models. In *Handbook of aging and the*  
686 *social sciences*. (Elsevier), pp. 135-147.
- 687 53. Gesquiere, L.R., Learn, N.H., Simao, M.C.M., Onyango, P.O., Alberts, S.C., and Altmann,  
688 J. (2011). Life at the top: rank and stress in wild male baboons. *Science* *333*, 357-  
689 360.
- 690 54. Campos, F.A., Villavicencio, F., Archie, E.A., Colchero, F., and Alberts, S.C. (2020).  
691 Social relationships, social status, and survival in wild baboons: A tale of two sexes.  
692 *Philosophical Transactions of the Royal Society. Series B: Biological Sciences*.
- 693 55. Archie, E.A., Altmann, J., and Alberts, S.C. (2012). Social status predicts wound  
694 healing in wild baboons. *Proceedings of the National Academy of Sciences* *109*,  
695 9017-9022.
- 696 56. Rasmussen, K. (1985). Changes in the activity budgets of yellow baboons (*Papio*  
697 *cynocephalus*) during sexual consortships. *Behavioral Ecology and Sociobiology* *17*,  
698 161-170.
- 699 57. Alberts, S.C., and Altmann, J. (2001). Immigration and hybridization patterns of  
700 yellow and anubis baboons in and around Amboseli, Kenya. *American Journal of*  
701 *Primatology: Official Journal of the American Society of Primatologists* *53*, 139-154.
- 702 58. Tung, J., Charpentier, M.J., Garfield, D.A., Altmann, J., and Alberts, S.C. (2008). Genetic  
703 evidence reveals temporal change in hybridization patterns in a wild baboon  
704 population. *Molecular Ecology* *17*, 1998-2011.
- 705 59. Altmann, J., Alberts, S.C., Haines, S.A., Dubach, J., Muruthi, P., Coote, T., Geffen, E.,  
706 Cheesman, D.J., Mututua, R.S., and Saiyalel, S.N. (1996). Behavior predicts genes  
707 structure in a wild primate group. *Proceedings of the National Academy of Sciences*  
708 *93*, 5797-5801.

- 709 60. Tung, J., Zhou, X., Alberts, S.C., Stephens, M., and Gilad, Y. (2015). The genetic  
710 architecture of gene expression levels in wild baboons. *Elife* 4, e04729.
- 711 61. Meissner, A., Gnirke, A., Bell, G.W., Ramsahoye, B., Lander, E.S., and Jaenisch, R.  
712 (2005). Reduced representation bisulfite sequencing for comparative high-  
713 resolution DNA methylation analysis. *Nucleic acids research* 33, 5868-5877.
- 714 62. Boyle, P., Clement, K., Gu, H., Smith, Z.D., Ziller, M., Fostel, J.L., Holmes, L., Meldrim, J.,  
715 Kelley, F., and Gnirke, A. (2012). Gel-free multiplexed reduced representation  
716 bisulfite sequencing for large-scale DNA methylation profiling. *Genome biology* 13,  
717 R92.
- 718 63. Krueger, F. (2012). Trim Galore: a wrapper tool around Cutadapt and FastQC to  
719 consistently apply quality and adapter trimming to FastQ files, with some extra  
720 functionality for MspI-digested RRBS-type (Reduced Representation Bisulfite-Seq)  
721 libraries. URL [http://www.bioinformatics.babraham.ac.uk/projects/trim\\_galore/](http://www.bioinformatics.babraham.ac.uk/projects/trim_galore/).
- 722 64. Xi, Y., and Li, W. (2009). BSMAP: whole genome bisulfite sequence MAPping  
723 program. *BMC bioinformatics* 10, 232.
- 724 65. Krueger, F. (2015). Trim Galore!: A wrapper tool around Cutadapt and FastQC to  
725 consistently apply quality and adapter trimming to FastQ files. (0.4).
- 726 66. Hastie, T., Tibshirani, R., Narasimhan, B., and Chu, G. (2001). impute: Imputation for  
727 microarray data. *Bioinformatics* 17, 520-525.
- 728 67. Friedman, J., Hastie, T., and Tibshirani, R. (2009). glmnet: Lasso and elastic-net  
729 regularized generalized linear models. R package version 1.
- 730 68. Friedman, J., Hastie, T., and Tibshirani, R. (2010). Regularization paths for  
731 generalized linear models via coordinate descent. *Journal of statistical software* 33,  
732 1.
- 733 69. Snyder-Mackler, N., Sanz, J., Kohn, J.N., Brinkworth, J.F., Morrow, S., Shaver, A.O.,  
734 Grenier, J.-C., Pique-Regi, R., Johnson, Z.P., and Wilson, M.E. (2016). Social status  
735 alters immune regulation and response to infection in macaques. *Science* 354, 1041-  
736 1045.
- 737 70. Altmann, J., Schoeller, D., Altmann, S.A., Muruthi, P., and Sapolsky, R.M. (1993). Body  
738 size and fatness of free - living baboons reflect food availability and activity levels.  
739 *American Journal of Primatology* 30, 149-161.
- 740 71. Silk, J.B., Beehner, J.C., Bergman, T.J., Crockford, C., Engh, A.L., Moscovice, L.R., Wittig,  
741 R.M., Seyfarth, R.M., and Cheney, D.L. (2010). Strong and consistent social bonds  
742 enhance the longevity of female baboons. *Current Biology* 20, 1359-1361.
- 743 72. Hausfater, G., Altmann, J., and Altmann, S. (1982). Long-term consistency of  
744 dominance relations among female baboons (*Papio cynocephalus*). *Science* 217,  
745 752-755.
- 746 73. Archie, E.A., Altmann, J., and Alberts, S.C. (2014). Costs of reproduction in a long-  
747 lived female primate: injury risk and wound healing. *Behavioral ecology and*  
748 *sociobiology* 68, 1183-1193.
- 749 74. Beehner, J.C., Onderdonk, D.A., Alberts, S.C., and Altmann, J. (2006). The ecology of  
750 conception and pregnancy failure in wild baboons. *Behavioral Ecology* 17, 741-750.
- 751 75. Altmann, J., and Alberts, S.C. (2003). Intraspecific variability in fertility and offspring  
752 survival in a nonhuman primate: behavioral control of ecological and social sources.  
753 *In Offspring: The Biodemography of Fertility and Family Behavior*, K.W. Wachter

- 754 and R.A. Bulatao, eds. (Washington, DC: The National Academies Press).  
755 76. Altmann, J., Hausfater, G., and Altmann, S.A. (1988). Determinants of Reproductive  
756 Success in Savannah Baboons, *Papio cynocephalus*. In *Reproductive Success: Studies*  
757 *of Individual Variation in Contrasting Breeding Systems*, T.H. Clutton-Brock, ed.  
758 (Chicago: The University of Chicago Press).  
759 77. Charpentier, M., Tung, J., Altmann, J., and Alberts, S. (2008). Age at maturity in wild  
760 baboons: genetic, environmental and demographic influences. *Molecular Ecology* *17*,  
761 2026-2040.  
762 78. Altmann, J., Altmann, S.A., and Hausfater, G. (1978). Primate infant's effects on  
763 mother's future reproduction. *Science* *201*, 1028-1030.  
764 79. Altmann, J., and Alberts, S.C. (2003). Variability in reproductive success viewed from  
765 a life - history perspective in baboons. *American Journal of Human Biology* *15*, 401-  
766 409.  
767 80. Lea, A.J., Learn, N.H., Theus, M.J., Altmann, J., and Alberts, S.C. (2014). Complex  
768 sources of variance in female dominance rank in a nepotistic society. *Animal*  
769 *behaviour* *94*, 87-99.  
770 81. Vilgalys, T.P., Rogers, J., Jolly, C.J., Mukherjee, S., and Tung, J. (2018). Evolution of  
771 DNA methylation in *Papio* baboons. *Molecular biology and evolution* *36*, 527-540.  
772 82. Irizarry, R.A., Ladd-Acosta, C., Wen, B., Wu, Z., Montano, C., Onyango, P., Cui, H., Gabo,  
773 K., Rongione, M., and Webster, M. (2009). The human colon cancer methylome  
774 shows similar hypo-and hypermethylation at conserved tissue-specific CpG island  
775 shores. *Nature genetics* *41*, 178.  
776 83. Consortium, E.P. (2012). An integrated encyclopedia of DNA elements in the human  
777 genome. *Nature* *489*, 57.  
778
